# Supplementary material
Source: Springer Nature journal article supplement (https://www.springermedizin.de/resource/supplementary/13063_2014_2322_MOESM7_ESM.pdf/9621892)
Supplement: MOESM7 [file 9621892]

## **ELIGIBILITY (data collected on entry form)**

- Adults with significant acute upper or lower gastrointestinal bleeding
- Responsible clinician is substantially uncertain as to the appropriateness of tranexamic acid in a patient

## **Appropriate CONSENT PROCESS (ie patient, representative or waiver)**

If a waiver is used, consent for continuation in the trial should be sought from the patient or relative as soon as possible after the emergency is over OR the patient regains competence.

## **RANDOMISE (tranexamic acid or placebo)**

Entry form completed

## **LOADING DOSE over 10 minutes**

## **MAINTENANCE DOSE over 24 hours**

If waiver used, obtain consent from patient or representative.  
Complete **OUTCOME FORM** at discharge, death or day 28 whichever is earlier

All clinically indicated treatment is given in addition to trial enrolment.  
Report adverse events as per protocol (up to day 28).
